# Supplementary material for: Combination cation substitution tuning of yellow-orange emitting phosphor Mg2Y2Al2Si2O12:Ce3+
Source: Royal Society of Chemistry journal article supplement (doi:10.1039/c4ra14425b), 2014-12-19
Supplement: c4ra14425b1.pdf [file c4ra14425b1.pdf]

---

Supplementary Information

**Combination cation substitution tuning of yellow-orange  
emitting phosphor  $\text{Mg}_2\text{Y}_2\text{Al}_2\text{Si}_2\text{O}_{12}:\text{Ce}^{3+}$**

Zaifa Pan,<sup>\*a</sup> Yu Xu,<sup>a</sup> Qingsong Hu,<sup>a</sup> Weiqiang Li,<sup>a</sup> Huan Zhou<sup>b</sup> and Yifan Zheng<sup>\*a</sup>

<sup>a</sup>College of Chemical Engineering, Zhejiang University of Technology, Hangzhou 310014, P.R. China

<sup>b</sup>Research Center of Analysis and Measurement, Zhejiang University of Technology, Hangzhou 310014, P.R. China.

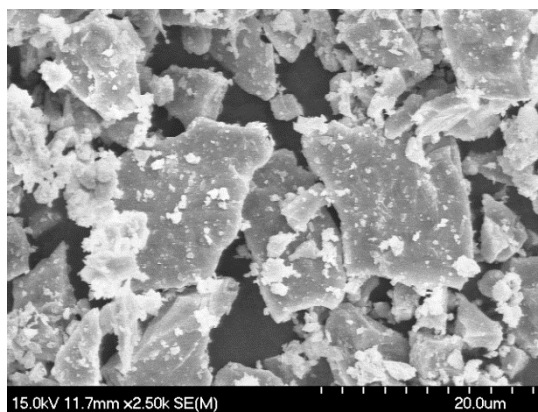

Figure S1 SEM image of the host  $\text{Mg}_2\text{Y}_2\text{Al}_2\text{Si}_2\text{O}_{12}$ .
